# Supplementary material for: Views of general practitioners on end-of-life care learning preferences: a systematic review
Source: PubMed Central journal article supplement (PMC9490975; doi:10.1186/s12904-022-01053-9), 2022-09-21
Supplement: 12904_2022_1053_MOESM1_ESM.pdf [file 12904_2022_1053_MOESM1_ESM.pdf]

## Additional file 1: Search Terms

|                                                     | PubMed                                                                                                                                  | CINAHL                                                                                     | PsycINFO                                                                                            | EMBASE                                                                                                                                                                                                           | Free text terms                                                                                                                                                                                                                           |
|-----------------------------------------------------|-----------------------------------------------------------------------------------------------------------------------------------------|--------------------------------------------------------------------------------------------|-----------------------------------------------------------------------------------------------------|------------------------------------------------------------------------------------------------------------------------------------------------------------------------------------------------------------------|-------------------------------------------------------------------------------------------------------------------------------------------------------------------------------------------------------------------------------------------|
|                                                     | MeSH terms                                                                                                                              | MH terms                                                                                   | DE terms                                                                                            | Emtree terms                                                                                                                                                                                                     |                                                                                                                                                                                                                                           |
| <b>Concept 1</b><br><br><b>Views</b>                | 1.Attitude of health personnel<br>2.Motivation<br>3.Emotions                                                                            | 1.Attitude of health personnel<br>2.Motivation<br>3.Emotion<br>4.Perception<br>5.Behaviour | 1. Health personnel attitudes<br>2. Motivation<br>3. Behaviour                                      | 1.Health personnel attitude<br>2. Beliefs<br>3.Emotions<br>4. Perspective<br>5. Behaviour<br>6. Opinion<br>7. Opine<br>8. Feeling<br>9. Thought<br>10. Think<br>11. Perception<br>12. Barrier<br>13. Facilitator | 1.View*<br>2.Perception<br>3.Perceive*<br>4.value*<br>5.Motivation*<br>6.Opinion*<br>7.Opine*<br>8.Perspective*<br>9.Attitude*<br>10.Belief*<br>11.Feel*<br>12.Thought*<br>13.Think*<br>14.Behaviour*<br>15. Barrier*<br>16. Facilitator* |
| <b>Concept 2</b><br><br><b>General Practitioner</b> | 1.General practice<br>2.General practice physician<br>3.Family physician<br>4.General practitioner<br>5.Family practice                 | 1.General practitioner<br>2.Family physician<br>3.Primary care physician                   | 1.Family Medicine<br>2.Family Physician                                                             | 1.General practitioner<br>2.Primary care physician<br>3.Family physician<br>4.General practice physician<br>5.Primary care physician<br>6.General practice                                                       | 1."General practice*"<br>2."General practitioner*"<br>3."Family physician*"<br>4."Family practice"                                                                                                                                        |
| <b>Concept 3</b><br><br><b>Learning preference</b>  | 1.Continuing education<br>2.Continuing medical education<br>3.Competency based education                                                | 1.Continuing medical education<br>2.Continuing education<br>3.education                    | 1.Continuing education<br>2.Medical education<br>3.Professional development<br>4.Distance education | 1.Continuing medical education<br>2.Continuing education<br>3. Continuing professional development                                                                                                               | 1.Education<br>2.Learning<br>3. Continuing medical education<br>4.Continuing education<br>5.Learning style*33<br>6.Learning preference*                                                                                                   |
| <b>Concept 4</b><br><br><b>End-of-life care</b>     | 1.Palliative care<br>2.Palliative medicine<br>3.Hospice<br>4.Hospice care<br>5.Hospice program<br>6.Terminal care<br>7.End of life care | 1.End of life care<br>2.Terminally ill patient<br>3.palliative care                        | Palliative care                                                                                     | 1.Terminal care<br>2.Palliative therapy<br>3.Hospice care<br>4.End of life care<br>5.Terminal care<br>6.Palliative care<br>7.Palliative Medicine                                                                 | 1.Palliat*<br>2.Hospice*<br>3."End of life care"<br>4."supportive care"                                                                                                                                                                   |

|  |  |  |  |                             |  |
|--|--|--|--|-----------------------------|--|
|  |  |  |  | 8.Hospice care<br>9.Hospice |  |
|--|--|--|--|-----------------------------|--|
