# Supplementary material for: Views of general practitioners on end-of-life care learning preferences: a systematic review
Source: PubMed Central journal article supplement (PMC9490975; doi:10.1186/s12904-022-01053-9), 2022-09-21

## Additional file 5: Thematic diagram of General Practitioner's End-of-Life Care learning preferences

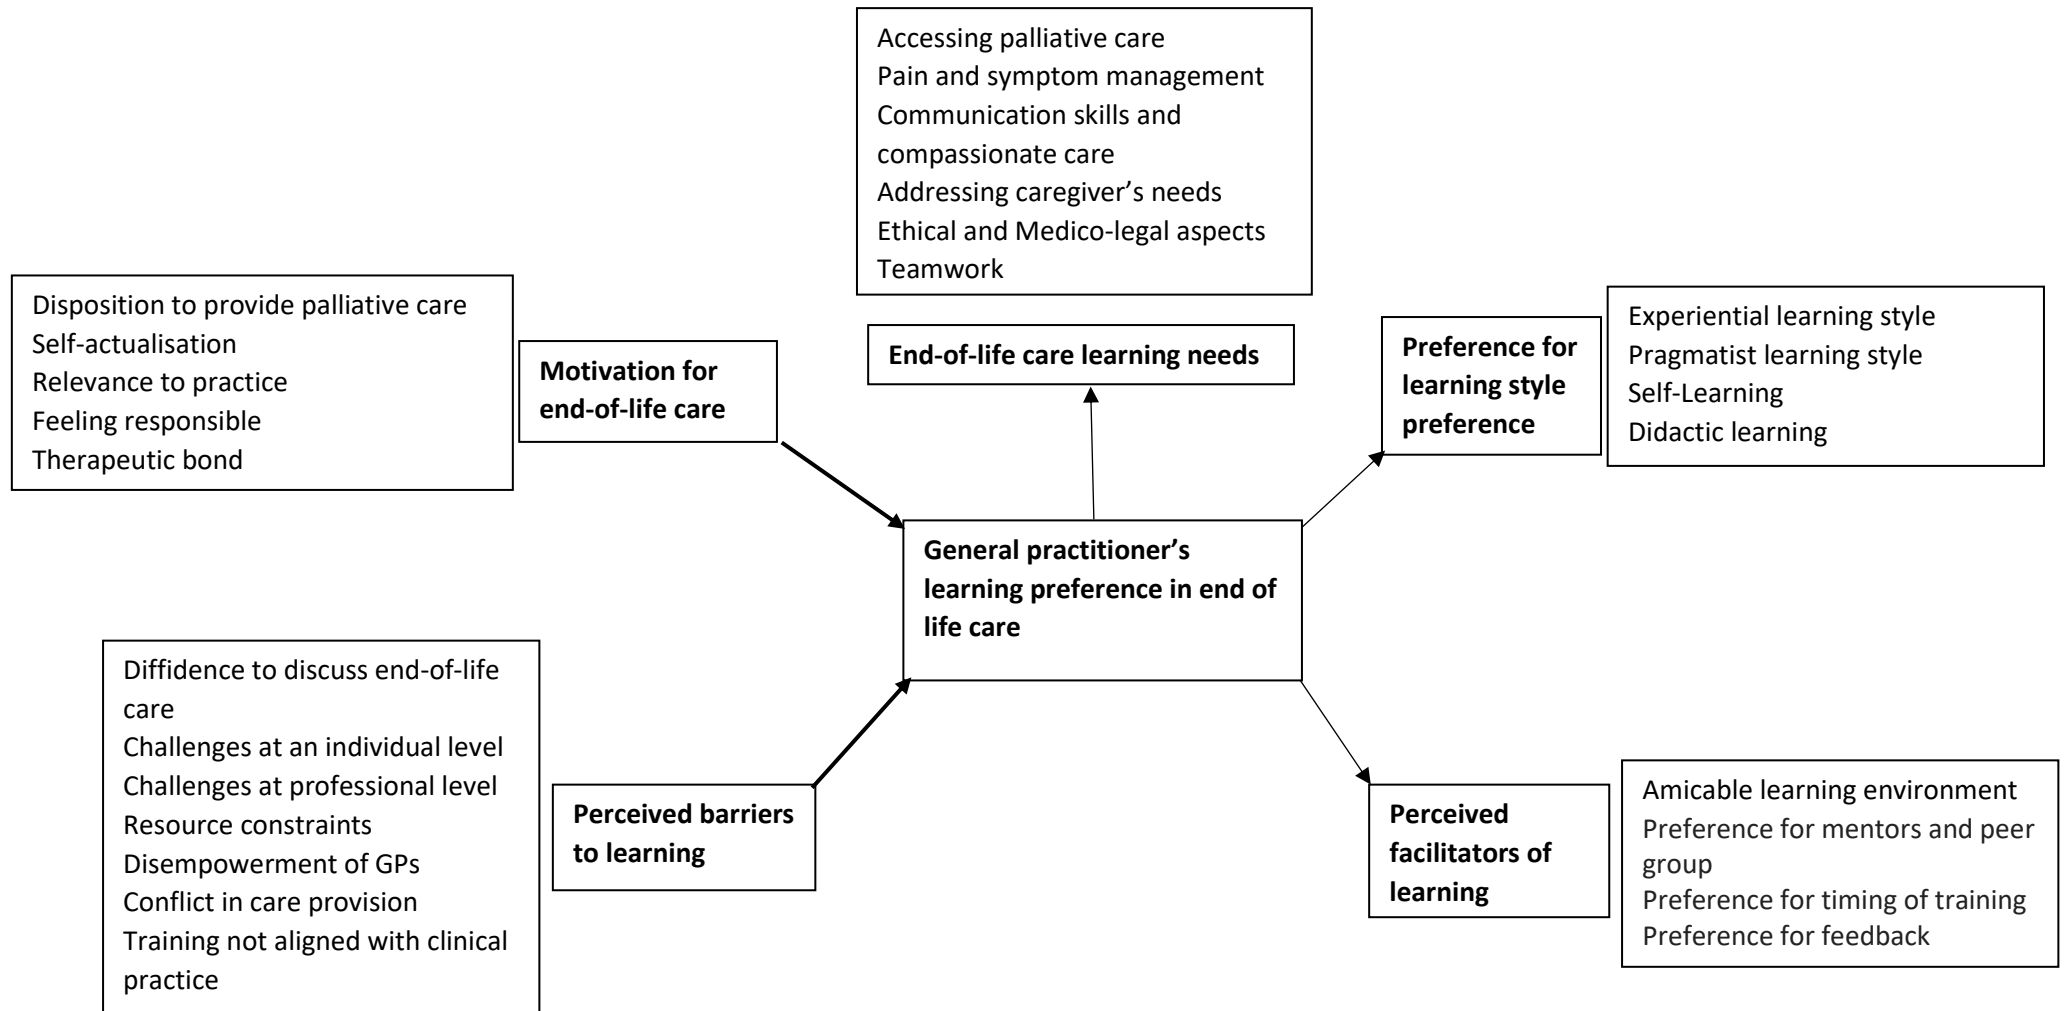

Supplement: 12904_2022_1053_MOESM5_ESM.pdf [file 12904_2022_1053_MOESM5_ESM.pdf]
