# Supplementary material for: Views of general practitioners on end-of-life care learning preferences: a systematic review
Source: PubMed Central journal article supplement (PMC9490975; doi:10.1186/s12904-022-01053-9), 2022-09-21
Supplement: 12904_2022_1053_MOESM6_ESM.pdf [file 12904_2022_1053_MOESM6_ESM.pdf]

## Additional file 6: Hawker's tool

### Assessment Form 1: Reject/Accept

---

Author(s):

Date of Publication:

Abbreviated Title:

Reviewer:

---

#### Relevance to Research Questions

### APPENDIX C

---

Author and title: \_\_\_\_\_

Date: \_\_\_\_\_

|                                     | Good | Fair | Poor | Very Poor | Comment |
|-------------------------------------|------|------|------|-----------|---------|
| 1. Abstract and title               |      |      |      |           |         |
| 2. Introduction and aims            |      |      |      |           |         |
| 3. Method and data                  |      |      |      |           |         |
| 4. Sampling                         |      |      |      |           |         |
| 5. Data analysis                    |      |      |      |           |         |
| 6. Ethics and bias                  |      |      |      |           |         |
| 7. Findings/results                 |      |      |      |           |         |
| 8. Transferability/generalizability |      |      |      |           |         |
| 9. Implications and usefulness      |      |      |      |           |         |
| Total                               |      |      |      |           |         |

---

## Appendix 6: Hawker's tool

### APPENDIX D

---

1. Abstract and title: Did they provide a clear description of the study?
  - Good            Structured abstract with full information and clear title.
  - Fair             Abstract with most of the information.
  - Poor            Inadequate abstract.
  - Very Poor     No abstract.
2. Introduction and aims: Was there a good background and clear statement of the aims of the research?
  - Good            Full but concise background to discussion/study containing up-to-date literature review and highlighting gaps in knowledge.  
Clear statement of aim AND objectives including research questions.
  - Fair             Some background and literature review.  
Research questions outlined.
  - Poor            Some background but no aim/objectives/questions, OR  
Aims/objectives but inadequate background.
  - Very Poor     No mention of aims/objectives.  
No background or literature review.
3. Method and data: Is the method appropriate and clearly explained?
  - Good            Method is appropriate and described clearly (e.g., questionnaires included).  
Clear details of the data collection and recording.
  - Fair             Method appropriate, description could be better.  
Data described.
  - Poor            Questionable whether method is appropriate.  
Method described inadequately.  
Little description of data.
  - Very Poor     No mention of method, AND/OR  
Method inappropriate, AND/OR  
No details of data.
4. Sampling: Was the sampling strategy appropriate to address the aims?
  - Good            Details (age/gender/race/context) of who was studied and how they were recruited.  
Why this group was targeted.  
The sample size was justified for the study.  
Response rates shown and explained.
  - Fair             Sample size justified.  
Most information given, but some missing.
  - Poor            Sampling mentioned but few descriptive details.
  - Very Poor     No details of sample.
5. Data analysis: Was the description of the data analysis sufficiently rigorous?
  - Good            Clear description of how analysis was done.  
Qualitative studies: Description of how themes derived/  
respondent validation or triangulation.  
Quantitative studies: Reasons for tests selected hypothesis driven/  
numbers add up/statistical significance discussed.
  - Fair             Qualitative: Descriptive discussion of analysis.  
Quantitative.
  - Poor            Minimal details about analysis.
  - Very Poor     No discussion of analysis.

## Appendix 6: Hawker's tool

6. Ethics and bias: Have ethical issues been addressed, and what has necessary ethical approval gained? Has the relationship between researchers and participants been adequately considered?
- |           |                                                                                                                                                         |
|-----------|---------------------------------------------------------------------------------------------------------------------------------------------------------|
| Good      | Ethics: Where necessary issues of confidentiality, sensitivity, and consent were addressed.<br>Bias: Researcher was reflexive and/or aware of own bias. |
| Fair      | Lip service was paid to above (i.e., these issues were acknowledged).                                                                                   |
| Poor      | Brief mention of issues.                                                                                                                                |
| Very Poor | No mention of issues.                                                                                                                                   |
7. Results: Is there a clear statement of the findings?
- |           |                                                                                                                                                                                                            |
|-----------|------------------------------------------------------------------------------------------------------------------------------------------------------------------------------------------------------------|
| Good      | Findings explicit, easy to understand, and in logical progression.<br>Tables, if present, are explained in text.<br>Results relate directly to aims.<br>Sufficient data are presented to support findings. |
| Fair      | Findings mentioned but more explanation could be given.<br>Data presented relate directly to results.                                                                                                      |
| Poor      | Findings presented haphazardly, not explained, and do not progress logically from results.                                                                                                                 |
| Very Poor | Findings not mentioned or do not relate to aims.                                                                                                                                                           |
8. Transferability or generalizability: Are the findings of this study transferable (generalizable) to a wider population?
- |           |                                                                                                                                                            |
|-----------|------------------------------------------------------------------------------------------------------------------------------------------------------------|
| Good      | Context and setting of the study is described sufficiently to allow comparison with other contexts and settings, plus high score in Question 4 (sampling). |
| Fair      | Some context and setting described, but more needed to replicate or compare the study with others, PLUS fair score or higher in Question 4.                |
| Poor      | Minimal description of context/setting.                                                                                                                    |
| Very Poor | No description of context/setting.                                                                                                                         |
9. Implications and usefulness: How important are these findings to policy and practice?
- |           |                                                                                                                                                                                           |
|-----------|-------------------------------------------------------------------------------------------------------------------------------------------------------------------------------------------|
| Good      | Contributes something new and/or different in terms of understanding/insight or perspective.<br>Suggests ideas for further research.<br>Suggests implications for policy and/or practice. |
| Fair      | Two of the above (state what is missing in comments).                                                                                                                                     |
| Poor      | Only one of the above.                                                                                                                                                                    |
| Very Poor | None of the above.                                                                                                                                                                        |
-
